# Supplementary material for: What is associated with increased side effects and lower perceived efficacy following switching to a generic medicine? A New Zealand cross-sectional patient survey
Source: PubMed Central journal article supplement — BMJ Open. 2018 Oct 18;8(10):e023667. doi: 10.1136/bmjopen-2018-023667 (PMC6196872; doi:10.1136/bmjopen-2018-023667), 2018-10-18
Supplement: bmjopen-2018-023667.draft_revisions.pdf [file bmjopen-2018-023667.draft_revisions.pdf]

# BMJ Open

BMJ Open is committed to open peer review. As part of this commitment we make the peer review history of every article we publish publicly available.

When an article is published we post the peer reviewers' comments and the authors' responses online. We also post the versions of the paper that were used during peer review. These are the versions that the peer review comments apply to.

The versions of the paper that follow are the versions that were submitted during the peer review process. They are not the versions of record or the final published versions. They should not be cited or distributed as the published version of this manuscript.

BMJ Open is an open access journal and the full, final, typeset and author-corrected version of record of the manuscript is available on our site with no access controls, subscription charges or pay-per-view fees (<http://bmjopen.bmj.com>).

If you have any questions on BMJ Open's open peer review process please email [info.bmjopen@bmj.com](mailto:info.bmjopen@bmj.com)

# BMJ Open

## What is associated with increased side effects and lower perceived efficacy following switching to a generic medicine: a cross-sectional patient survey

|                               |                                                                                 |
|-------------------------------|---------------------------------------------------------------------------------|
| Journal:                      | <i>BMJ Open</i>                                                                 |
| Manuscript ID                 | bmjopen-2018-023667                                                             |
| Article Type:                 | Research                                                                        |
| Date Submitted by the Author: | 18-Apr-2018                                                                     |
| Complete List of Authors:     | MacKrell, Kate; University of Auckland<br>Petrie, Keith; University of Auckland |
| Keywords:                     | generic medicine, drug switching, perceptions, placebo, side effects            |
|                               |                                                                                 |

SCHOLARONE™  
Manuscripts  
Review only

1  
2  
3  
4 **What is associated with increased side effects and lower perceived efficacy following**  
5 **switching to a generic medicine: a cross-sectional patient survey**  
6  
7  
8  
9  
10

11  
12 Kate MacKrell, Keith J Petrie

13  
14 University of Auckland, Private Bag 92019, New Zealand

15  
16  
17  
18 Department of Psychological Medicine, University of Auckland, New Zealand.  
19

20  
21  
22 Kate MacKrell, Graduate student, Department of Psychological Medicine, University of  
23  
24 Auckland

25  
26 Keith J Petrie, Professor, Department of Psychological Medicine, University of Auckland  
27  
28  
29  
30  
31

32 Word count: 3629  
33  
34  
35

36 Keywords: generic medicine; drug switching; perceptions; nocebo; drug efficacy; side effects  
37  
38  
39  
40  
41

42 Correspondence to: Professor Keith Petrie [kj.petrie@auckland.ac.nz](mailto:kj.petrie@auckland.ac.nz)  
43  
44  
45  
46  
47  
48  
49  
50  
51  
52  
53  
54  
55  
56  
57  
58  
59  
60

**ABSTRACT****OBJECTIVE**

Following a switch from either a generic or branded antidepressant (venlafaxine) to a new generic we investigated the factors associated with a preference for branded medicines, side effects reported following switching and efficacy ratings of the new generic drug.

**DESIGN**

A cross-sectional survey of patients switched to a new generic.

**SETTING**

Community

**PARTICIPANTS**

310 patients, comprising 205 originally on branded venlafaxine and 105 previously taking a generic version.

**MAIN OUTCOME MEASURES**

An online questionnaire assessing demographic factors, perceived sensitivity to medicines, trust in pharmaceutical agencies, sources of switch information, preference for branded medicine, new medicine perceptions, side effects and efficacy ratings.

**RESULTS**

Preference for branded medicine was significantly stronger in older patients, those taking branded venlafaxine and patients with a higher perceived sensitivity to medicine. In those switching from generic venlafaxine, higher reported side effects were associated with a lower perceived efficacy of the new generic. In those switching from branded venlafaxine, greater side effect reporting was associated with older age, female gender, lower education, time on previous medication and lower perceived efficacy of the new generic. The significant predictors of efficacy ratings of the new generic in both groups were trust in pharmaceutical agencies and the number of side effects.

**CONCLUSIONS**

In patients switching from a branded medicine and those already taking a generic, different demographic and psychological factors are associated with preference for branded medicine,

1  
2  
3 side effect reporting and perceived efficacy of the new drug. When switching to new generic  
4 there appears to be a close bidirectional relationship between the experience of side effects  
5 and perceived drug efficacy. Trust in pharmaceutical agencies impacts directly on perceived  
6 efficacy and increasing such trust through an explanation of equivalence testing and  
7 monitoring could impact on efficacy beliefs, reduce side effects and later non-adherence  
8 following a generic switch.  
9  
10  
11  
12  
13  
14  
15

## 16 **ARTICLE SUMMARY**

### 17 **Strengths and limitations of the study**

- 18 • The study examined both patients on a branded-originator as well as those already  
19 on a generic switched to a new generic medicine.  
20
- 21 • While previous research has used placebo treatments and non-patient participants,  
22 our study examined preferences and perceptions in a patient sample that had  
23 recently undergone a generic switch in antidepressant medication.  
24
- 25 • Our study is limited by the fact that patients were not randomly sampled and whether  
26 respondents were actually taking venlafaxine could not be independently  
27 corroborated.  
28  
29  
30  
31  
32  
33  
34  
35  
36  
37  
38  
39  
40  
41  
42  
43  
44  
45  
46  
47  
48  
49  
50  
51  
52  
53  
54  
55  
56  
57  
58  
59  
60

## INTRODUCTION

Generic medicines present a cost-effective option for health funders, as they provide the same therapeutic effect as branded medicine, but at a much more affordable price. While generic drugs are now widely used, a significant proportion of the general public, doctors and pharmacists report negative perceptions of generics, in terms of their effectiveness, safety and likelihood to cause side effects.[1] Many patients believe that generic drugs are not suitable for treating serious conditions[2] and there seems greater reluctance to accept generics in patients already established on branded antidepressants compared to other types of medicines.[3]

Negative perceptions of generics can lead to an increase in the nocebo effect following switching from a branded to a generic alternative with greater complaints of side effects and beliefs that the new medication is less effective.[4] These perceptions can cause increased adverse event reporting, drug refusal and non-adherence when patients are switched from a branded to a generic medicine.[5-7] Beliefs that the drug is less effective or causing side effects can also result in a significant number of patients switching back to the branded medication, resulting in less cost savings for the health system.[8]

There has been little research on the factors associated with a nocebo response following a switch to generic medicine. Previous research suggests patients who have high perceived sensitivity to medicine may be more reluctant to change to a generic and more likely to report side effects.[9] Trust in pharmaceutical agencies such as drug companies and the government organisations regulating drugs also seem to be important factors in generic acceptance.[10] A recent study investigating the attribution of symptoms to a placebo described as “a well-known tablet” found that perceived sensitivity to medicine increased the odds of attributing symptoms to the placebo tablet, while trust in medicines and pharmaceutical companies decreased the likelihood of attributing symptoms.[11]

In 2017, the Pharmaceutical Management Agency (Pharmac), the New Zealand government agency responsible for subsidising medicines, changed the funded version of the antidepressant venlafaxine. Over the course of 2017, 45,000 New Zealanders prescribed

1  
2  
3 either Efexor XR (the branded originator) or Arrow-Venlafaxine XR (a generic version) were  
4 switched to a new generic, Enlifax XR. From the outset of the venlafaxine brand switch,  
5  
6 some patients reported side effects from the new generic, such as nausea, fatigue,  
7  
8 headaches, suicidal thoughts and stated that the drug was not as effective as their previous  
9  
10 branded version. Media stories following the switch to generic venlafaxine reflected patient  
11  
12 concerns, with article headlines such as “Patients say generic Pharmac-funded version of  
13  
14 antidepressant venlafaxine left them depressed, anxious”[12] and “Anti-depressant swap:  
15  
16 Sufferers claim generic drug is harming their condition”.[13] This drug switch allowed the  
17  
18 opportunity to examine differences between patients switched from an originator brand as  
19  
20 well as generic venlafaxine to a new generic version of the antidepressant. The aim of the  
21  
22 study was to investigate how both branded and generic groups viewed generic drugs and  
23  
24 what factors influenced a preference for branded medicines. We also investigated what  
25  
26 factors were associated with side effect reporting following the switch and patients’ efficacy  
27  
28 ratings of the new generic drug.  
29

## 30 **METHOD**

### 31 **Participants and procedure**

32  
33 Visitors to the [venlafaxine brand change page](#) on the Pharmac website were invited to  
34  
35 complete an online questionnaire about their perceptions and experiences of the venlafaxine  
36  
37 brand change. To be eligible to participate, respondents had to be 16 years of age or older  
38  
39 and currently taking any brand of venlafaxine medication. A link to the survey was provided  
40  
41 on the same webpage and was live from 6 March 2017 to 29 October 2017. The survey was  
42  
43 anonymous and confidential, with IP addresses and geo-location data from individual  
44  
45 responses not recorded. In total, 413 people accessed the survey, however, 103  
46  
47 respondents were excluded: 85 did not complete the survey, nine did not meet the inclusion  
48  
49 criteria and a further nine participants did not know their original brand of venlafaxine. This  
50  
51 resulted in a final sample of 310 participants.  
52  
53

### 54 **Measures**

#### 55 *Demographic information*

56  
57  
58  
59  
60

1  
2  
3 Participants completed information on age, gender, relationship status, employment status,  
4  
5 highest level of education completed and ethnicity.

#### 6 7 *Venlafaxine brand information, efficacy ratings and medication preference*

8  
9 Introductory survey questions collected information on participants' old venlafaxine  
10  
11 prescription, specifically the medication brand, time on drug and how participants found out  
12  
13 about the brand switch. Participants' perceived efficacy of their old brand and the new  
14  
15 generic was assessed using an 11-point scale from 0 "Does not work well" to 10 "Works  
16  
17 extremely well". Participants were asked to consider if given the choice to take a branded or  
18  
19 generic version of a prescribed medicine with no difference in cost, which medicine would  
20  
21 they prefer to take? Answers were scored "branded version", "generic version" or "no  
22  
23 preference". They were also asked to specify, of branded versus generic medicines, which  
24  
25 did they expect to be more effective, safe and have fewer side effects. Answers were scored  
26  
27 "branded version", "generic version" or "no difference". Participants were also asked: "how  
28  
29 often do you look up medication information on the Internet?" assessed using an 11-point  
30  
31 scale from 0 "Never" to 10 "Always".

#### 32 33 *Trust in pharmaceutical agencies*

34  
35 Participants were asked to rate how much they trusted brand switch information from  
36  
37 pharmacists, PHARMAC, Medsafe and pharmaceutical companies on an 11-point scale from  
38  
39 0 "Do not trust" to 10 "Completely trust". Participants' scores for these items were summed to  
40  
41 create an overall score of trust in pharmaceutical agencies, which had an acceptable  
42  
43 Cronbach's alpha ( $\alpha = .79$ ).

#### 44 45 *Side effects*

46  
47 Participants were given a list of 15 frequently reported symptoms (e.g., headache, dizziness,  
48  
49 chest pain, nausea, abdominal pain[14]) and were asked to indicate whether they had  
50  
51 experienced any from the new generic venlafaxine within the past week. Answers were  
52  
53 scored "yes", "maybe" or "no". The number of side effects experienced (both yes and maybe)  
54  
55 was summed to create a total side effect score.

#### 56 57 *Perceived sensitivity to medicines*



1  
2  
3 The perceived sensitivity to medicines scale[15] was used to assess participants' self-rated  
4 reaction to medicines. The scale consists of five items rated on a 5-point scale from 1  
5  
6 "Strongly Disagree" to 5 "Strongly Agree", an example being "My body overacts to  
7  
8 medicines". The five items were summed to create a total sensitivity score ranging from 5 to  
9  
10 25, with higher scores indicating a greater perceived sensitivity to the adverse effect of  
11  
12 medicines.

### 14 **Statistical analyses**

15  
16 Analyses were performed using IBSM SPSS 24. To ascertain what factors influence people's  
17  
18 general medicine preferences, a logistic regression was conducted with medication  
19  
20 preference converted to a binary outcome variable of generic or no preference (0) versus a  
21  
22 preference for branded medication (1). The predictors in this model were age, gender,  
23  
24 education level (dichotomised and dummy coded as university degree 1 or lower 0), ethnicity  
25  
26 (NZ European 1 or other 0, pre-switch medication type (brand 1 or generic 0) time on  
27  
28 previous venlafaxine brand, participants' perceived efficacy of their old brand, perceived  
29  
30 efficacy of the new generic, perceived sensitivity to medicines score, pharmaceutical trust  
31  
32 score and the degree to which participants look up medicine information on the internet.

33  
34 In further analyses, the total sample was separated into two groups: the participants  
35  
36 who switched from branded venlafaxine to the new generic and those who switched from the  
37  
38 old generic to the new version. Independent sample t-tests and chi-square tests were  
39  
40 conducted to investigate whether there were any differences between the brand and generic  
41  
42 switch groups on demographic variables, beliefs about the efficacy, safety and side effects of  
43  
44 branded and generic medicines, efficacy ratings of the new generic venlafaxine and side  
45  
46 effect reports. To investigate what factors were associated with the two groups' efficacy  
47  
48 ratings of the new generic, a multiple linear regression was conducted for each group using  
49  
50 participants' efficacy rating of the new generic as the outcome variable. The predictor  
51  
52 variables used in these analyses were the same variables used in the analysis of medication  
53  
54 preferences, except with the removal of pre-switch medication type and new generic efficacy  
55  
56 rating and the inclusion of the number of side effects reported. To investigate the factors  
57  
58  
59  
60

1  
2  
3 associated with greater side effect reporting in the two groups, multiple linear regressions  
4 were conducted with the side effect score as the outcome variable. The predictor variables  
5 used in these models were the same as medication preferences except with pre-switch  
6 medication type removed. An alpha level of .05 was used for all analyses.  
7  
8  
9

## 10 **RESULTS**

11  
12 The sample was predominantly female  $n = 246$  (79.4%) with a mean age of 45 years ( $SD =$   
13 13.50). The majority of the sample identified as New Zealand or other European  $n = 275$   
14 (88.7%), 21 (6.8%) as Māori and smaller proportions identifying as Asian, Pacific Islander  
15 and other ethnicities. The demographic breakdown of the sample is similar to the total  
16 population of venlafaxine users in New Zealand. Two hundred and five people were  
17 previously on branded venlafaxine and 105 were taking a generic. There were no significant  
18 differences between the two switch groups on demographic variables (see table 1).  
19  
20  
21  
22  
23  
24  
25

26 The majority of the sample,  $n = 228$  (73.5%), found out about the venlafaxine brand  
27 switch through a pharmacist, while 45 participants (14.5%) said they were not directly told  
28 about the switch and only found out after noticing a change in their tablets and 12 people  
29 (3.9%) were informed of the brand switch by their doctor. The remaining proportion either  
30 found out through the Pharmac website, social media or news media, or friends and family.  
31  
32 However, when participants were asked how they would have preferred to have found out  
33 about the brand switch, 173 (55.8%) said through their doctor, 86 (27.7%) by a pharmacist  
34 and 36 (11.6%) from Pharmac directly.  
35  
36  
37  
38  
39  
40  
41  
42  
43  
44  
45  
46  
47  
48  
49  
50  
51  
52  
53  
54  
55  
56  
57  
58  
59  
60

**Table 1** Demographics characteristics for the population of venlafaxine users and comparison between branded and generic switch study samples

| Variable                         | Population    | Brand Sample | Generic Sample | $t/\chi^2$ | <i>p</i> |
|----------------------------------|---------------|--------------|----------------|------------|----------|
|                                  | (n = 49,175)  | (n = 205)    | (n = 105)      |            |          |
|                                  | n (%)         | n (%)        | n (%)          |            |          |
| Age (mean, SD)                   | -             | 45.0 (13.16) | 44.3 (14.18)   | 0.38       | .703     |
| Age group                        |               |              |                | 5.44       | .364     |
| > 19 years                       | 1,155 (2.3)   | 0            | 1 (1.0)        |            |          |
| 20-29 years                      | 7,309 (14.9)  | 27 (13.2)    | 20 (19.0)      |            |          |
| 30-39 years                      | 8,202 (16.7)  | 50 (24.4)    | 20 (19.0)      |            |          |
| 40-49 years                      | 10,899 (22.2) | 50 (24.4)    | 21 (20.0)      |            |          |
| 50-69 years                      | 16,677 (33.9) | 51 (24.9)    | 26 (24.8)      |            |          |
| < 70 years                       | 4,933 (10.0)  | 27 (13.2)    | 17 (16.2)      |            |          |
| Gender                           |               |              |                | 0.70       | .401     |
| Male                             | 17,478 (35.5) | 42 (20.7)    | 17 (16.7)      |            |          |
| Female                           | 31,695 (64.5) | 161 (79.3)   | 85 (83.3)      |            |          |
| Ethnicity                        |               |              |                | 0.22       | .896     |
| European                         | 42,944 (87.3) | 184 (90.6)   | 91 (89.2)      |            |          |
| Māori                            | 4,210 (8.6)   | 13 (6.4)     | 8 (7.8)        |            |          |
| Other                            | 2,021 (4.1)   | 6 (3.0)      | 3 (2.9)        |            |          |
| Education level                  |               |              |                | 3.26       | .196     |
| Secondary school or below        |               | 44 (22.0)    | 33 (31.4)      |            |          |
| Diploma/Trade certificate        |               | 68 (34.0)    | 32 (30.5)      |            |          |
| University degree                |               | 88 (44.0)    | 40 (38.1)      |            |          |
| Relationship status              |               |              |                | 5.83       | .120     |
| Married, civil union, cohabiting |               | 124 (61.7)   | 53 (51.5)      |            |          |
| Single                           |               | 48 (23.9)    | 32 (31.1)      |            |          |
| Divorced, separated              |               | 25 (12.4)    | 18 (17.5)      |            |          |
| Widow, widower                   |               | 4 (2.0)      | 0              |            |          |

$t/\chi^2$  analyses conducted between the brand sample and generic sample.

Population data obtained from Pharmac.

### Preference for branded or generic medicine

One hundred and eighty participants (58.1%) reported a greater preference for branded medicines overall while 130 (41.9%) preferred generics or had no preference. Compared to those previously taking a generic, a greater proportion of those originally taking the branded

venlafaxine considered branded medicines to be safer, more effective and have fewer side effects than generics (Figure 1). Those prescribed generics were more likely to perceive branded and generic medicines as being equivalent in safety, efficacy and the number of side effects.

(Figure 1)

The analysis of factors influencing people's medicine preferences was significant,  $\chi^2(12) = 44.74$ ,  $p < .001$ , Nagelkerke  $R^2 = .20$ . The significant factors associated with medicine preference were participants' age, pre-switch medication type and perceived sensitivity to medicines. The results indicate that an older age, originally being on the branded venlafaxine medication and a greater perceived sensitivity to medicines is associated with a greater preference for branded medicines overall (Table 2).

**Table 2** Factors associated with a preference for branded medicines

| Variable                                 | B     | Wald  | OR   | <i>p</i> | 95% CI for OR |
|------------------------------------------|-------|-------|------|----------|---------------|
| Age                                      | 0.04  | 10.66 | 1.04 | .001     | 1.01, 1.05    |
| Gender                                   | -0.16 | 0.21  | 0.86 | .647     | 0.44, 1.67    |
| Education level                          | -0.23 | 0.68  | 0.80 | .411     | 0.46, 1.37    |
| Ethnicity                                | 0.33  | 0.72  | 1.40 | .396     | 0.65, 3.01    |
| Pre-switch medication type               | 0.71  | 5.55  | 2.02 | .019     | 1.13, 3.64    |
| Time on previous brand                   | 0.00  | 0.00  | 1.00 | .961     | 0.86, 1.18    |
| Perceived efficacy of old brand          | 0.11  | 2.97  | 1.11 | .085     | 0.99, 1.25    |
| Perceived efficacy of new generic        | 0.00  | 0.01  | 1.00 | .940     | 0.92, 1.10    |
| Perceived sensitivity to medicines       | 0.11  | 14.17 | 1.12 | <.001    | 1.06, 1.19    |
| Trust in pharmaceutical agencies         | -0.02 | 1.60  | 0.98 | .206     | 0.95, 1.01    |
| Look up medicine information on internet | 0.03  | 0.34  | 1.03 | .560     | 0.93, 1.14    |

### Efficacy ratings of the new generic

Both brand and generic switchers rated the efficacy of their old medication very highly (brand switchers  $M = 8.46$  out of 10,  $SD = 2.52$ ; generic switchers  $M = 8.43$ ,  $SD = 2.16$ ). For the new generic, there were no differences between brand switchers ( $M = 3.04$ ,  $SD = 2.97$ ) and generic switchers ( $M = 3.46$ ,  $SD = 3.09$ ) in efficacy ratings,  $t(299) = -1.17$ ,  $p = .244$ , 95% CI -1.14 to 0.29. The factors associated with efficacy ratings in the brand and generic switch

groups were investigated. The regression model was significant for the brand switch group,  $F(10, 172) = 3.72, p < .001, R^2 = .18$ , and the generic switch group,  $F(10, 84) = 5.07, p < .001, R^2 = .38$ . For both the brand and generic switch groups, the only variables that were significant predictors of new generic efficacy ratings was the pharmaceutical trust score and number of side effects reported (see table 3). Regardless of whether participants were switching from a branded medicine or a generic, a greater degree of trust in pharmaceutical agencies and fewer side effects reported were associated with a greater perceived efficacy of the new generic venlafaxine.

**Table 3** Factors associated with the efficacy ratings of the new generic medicine for brand switchers and generic switchers

| Variable                                 | Brand Switchers |         |       |              | Generic Switchers |         |       |              |
|------------------------------------------|-----------------|---------|-------|--------------|-------------------|---------|-------|--------------|
|                                          | B               | $\beta$ | $p$   | 95% CI for B | B                 | $\beta$ | $p$   | 95% CI for B |
| Age                                      | -0.01           | -.03    | .656  | -0.04, 0.03  | 0.02              | .07     | .457  | -0.03, 0.06  |
| Gender                                   | 0.53            | .07     | .304  | -0.48, 1.54  | -0.98             | -.12    | .187  | -2.44, 0.48  |
| Education level                          | -0.78           | -.13    | .079  | -1.66, 0.09  | -0.58             | -.09    | .339  | -1.77, 0.62  |
| Ethnicity                                | -1.16           | -.13    | .086  | -2.49, 0.17  | 0.03              | .00     | .966  | -1.44, 1.51  |
| Time on previous brand                   | -0.16           | -.09    | .245  | -0.42, 0.11  | -0.07             | -.04    | .677  | -0.38, 0.25  |
| Perceived efficacy of old brand          | 0.16            | .13     | .083  | -0.02, 0.34  | 0.02              | -.01    | .891  | -0.25, 0.29  |
| Perceived sensitivity to medicines       | 0.02            | .03     | .679  | -0.07, 0.10  | -0.03             | -.04    | .682  | -0.15, 0.10  |
| Trust in pharmaceutical agencies         | 0.09            | .26     | <.001 | 0.04, 0.13   | 0.18              | .45     | <.001 | 0.11, 0.24   |
| Look up medicine information on internet | -0.02           | -.01    | .854  | -0.18, 0.15  | -0.01             | -.01    | .959  | -0.22, 0.21  |
| Number of side effects                   | -0.17           | -.235   | .002  | -0.28, -0.07 | -0.27             | -.33    | <.001 | -0.42, -0.13 |

### Side effect reports from the new generic

There was no significant difference in the brand group ( $M = 4.43, SD = 4.07$ ) and generic group ( $M = 4.85, SD = 3.91$ ) in reported side effects following the switch to the new generic,  $t(308) = -0.86, p = .392, 95\% CI -1.36$  to  $0.54$ . An analysis of the factors associated with greater side effect reporting for brand switchers and generic switchers was conducted and is summarised in table 4. The regression model of the brand switchers was significant,  $F(10, 172) = 3.61, p < .001, R^2 = .17$ . Age, gender, education level, duration of time on the old brand and perceived efficacy of the new generic were significantly associated with side effect reporting. The analysis shows that brand switchers who were older, female, had an

education level below a university degree, had taken Efexor for a longer period of time and had a lower perceived efficacy of the new generic reported a greater number of side effects from the new generic medication.

The regression model for the generic switchers was also significant  $F(10, 84) = 2.13$ ,  $p = .031$ ,  $R^2 = .20$ . However, the only significant predictor of side effects for this group was perceived efficacy of the new generic. Generic switchers who had a lower perceived efficacy of the new generic reported more side effects following the switch to the new generic.

**Table 4** Factors associated with side effect reporting for brand switchers and generic switchers

| Variable                                 | Brand Switchers |         |      |              | Generic Switchers |         |       |              |
|------------------------------------------|-----------------|---------|------|--------------|-------------------|---------|-------|--------------|
|                                          | B               | $\beta$ | $p$  | 95% CI for B | B                 | $\beta$ | $p$   | 95% CI for B |
| Age                                      | 0.06            | .18     | .017 | 0.01, 0.10   | 0.01              | .04     | .671  | -0.05, 0.07  |
| Gender                                   | 1.41            | .14     | .047 | 0.02, 2.79   | -0.96             | -.10    | .347  | -2.99, 1.06  |
| Education level                          | -1.61           | -.20    | .008 | -2.81, -0.42 | -1.04             | -.13    | .210  | -2.68, 0.60  |
| Ethnicity                                | -0.39           | -.03    | .680 | -2.23, 1.46  | -1.23             | -.12    | .229  | -3.24, 0.79  |
| Time on previous brand                   | -0.50           | -.20    | .007 | -0.86, -0.14 | 0.07              | .03     | .766  | -0.37, 0.50  |
| Perceived efficacy of old brand          | 0.21            | .12     | .102 | -0.04, 0.46  | 0.13              | .08     | .461  | -0.24, 0.51  |
| Perceived efficacy of new generic        | -0.33           | -.24    | .002 | -0.53, -0.13 | -0.52             | -.42    | <.001 | -0.79, -0.24 |
| Perceived sensitivity to medicines       | -0.04           | -.05    | .486 | -0.16, 0.08  | 0.03              | .04     | .718  | -0.14, 0.20  |
| Trust in pharmaceutical agencies         | -0.01           | -.02    | .760 | -0.07, 0.06  | 0.06              | .13     | .245  | -0.04, 0.17  |
| Look up medicine information on internet | -0.05           | -.03    | .664 | -0.28, 0.18  | 0.16              | .12     | .282  | -0.13, 0.46  |

## DISCUSSION

### Key findings

In a sample of patients switched to a new generic version of venlafaxine the study found that preference for branded medication was associated with older age, being on the branded venlafaxine medication prior to the switch and a greater perceived sensitivity to medicines.

A greater proportion of patients originally prescribed branded venlafaxine expected branded medicines to be more effective, safe and have fewer side effects than generics, compared to patients taking the generic who were more likely to perceive branded and generic medicines as equivalent. For both patient groups, those switching from the branded medication and those switching from a generic, a greater degree of trust in pharmaceutical agencies and less side effects reported were associated with a higher perceived efficacy of the new generic

1  
2  
3 venlafaxine. For those switching from the branded venlafaxine, being older, female, having a  
4 lower education level, being on the branded drug for a longer time and having a lower  
5 perceived efficacy of the new generic was associated with reporting a greater number of side  
6 effects from the new generic medication. For those patients already on a generic, only a  
7 lower perceived efficacy of the new drug was associated with side effect reporting.  
8  
9

### 12 **Implications**

14 Switches from originator branded medicines to their generic counterparts provide an  
15 economic choice for health funders by enabling more patients to be treated through cost-  
16 savings. Negative perceptions of generics can cause increased side effects and perceptions  
17 of lower efficacy, which may result in non-adherence and low persistence with the new drug  
18 and reduce the potential economic benefits of a switch. This study shows that trust in  
19 pharmaceutical agencies, including drug companies and regulators, is a key factor in  
20 patients' beliefs in the efficacy of the new generic medicine.  
21  
22  
23  
24  
25  
26  
27

28 Another important finding of the study is the close reciprocal relationship between  
29 perceived drug efficacy and reported side effects. The presence of increased side effects are  
30 associated with a perception that the drug does not work as well and conversely, this low  
31 efficacy beliefs are associated with greater reports of side effects. This is consistent with a  
32 recent study that showed when side effects are modelled by another person receiving the  
33 same medication (study confederate), this can influence not only reported side effects in the  
34 individual viewing the person but also reduce the effectiveness of the drug.[16]  
35  
36  
37  
38  
39  
40  
41

42 The study also highlights the fact that patients who switch from a branded medicine  
43 and those who switch from a generic are likely to have different concerns. Patients already  
44 on a generic medicine tend to have a more favourable perception of generics compared to  
45 those taking a branded medicine and the factors that influence side effect reports following a  
46 medicine brand switch are different for brand switchers compared to generic switchers.  
47  
48 People switching from branded medicines are likely to have more difficulties and  
49 interventions focused on building trust in pharmaceutical agencies around the switch are  
50 likely to have positive effects in influencing the perceived efficacy of the new drug and  
51  
52  
53  
54  
55  
56  
57  
58  
59  
60

1  
2  
3 subsequent side effects. This could include explaining the level of testing required to  
4 establish drug equivalency and the monitoring of that does occur by drug agencies.

### 6 **Strengths and limitations**

8 One of the strengths of the study was that it included patients who were switched from  
9 branded originator medication as well as patients on a generic. To our knowledge this is the  
10 first time a study has looked at these groups in the same switch to a generic to examine  
11 factors related to side effect reporting and efficacy perceptions. Previous research  
12 investigating perceptions and responses to medicine change has previously used placebo  
13 tablets and non-patient participants.[4,17] The fact that the sample was recruited from the  
14 Pharmac venlafaxine brand change webpage means these patients are likely to be more  
15 typical of patients who have concern and difficulties managing a generic switch. A weakness  
16 of the study was that patients were not randomly sampled and whether respondents were  
17 actually taking venlafaxine could not be independently corroborated.

### 28 **Conclusions**

30 These results suggest in a switch to a generic drug different factors are associated with  
31 preference for branded medicine, side effect reporting and perceived efficacy of the new drug  
32 in patients switching from a branded medicine and those already taking a generic. When  
33 switching to new generic there appears to be a close bidirectional relationship between the  
34 experience of side effects and perceived drug efficacy. Trust in pharmaceutical agencies  
35 impacts directly on perceived efficacy and increasing such trust through an explanation of  
36 equivalence testing and monitoring could impact on efficacy beliefs, reduce nocebo effects  
37 and later non-adherence following a generic switch.

### 48 **Acknowledgements**

50 Janet Mackay from Pharmac for help with establishing the survey and demographic  
51 breakdown of venlafaxine users.  
52  
53  
54  
55  
56  
57  
58  
59  
60



1  
2  
3  
4  
5 **Author contributions** KM and KJP designed the study, planned the data analysis,  
6 interpreted the results and drafted and revised the manuscript. KM collected the data and  
7 performed the data analyses. KP is guarantor.

8  
9 **Funding** This research received no specific grant from any funding agency in the public,  
10 commercial or not-for-profit sectors.

11 **Competing interests:** We have read and understood BMJ policy on declaration of interest  
12 and declare the following: KM declares no conflict of interest. KP has previously received  
13 research funding from Pharmac, the New Zealand Government's Pharmaceutical  
14 Management Agency.

15  
16 **Licence.** The Corresponding Author has the right to grant on behalf of all authors and does  
17 grant on behalf of all authors, an exclusive licence (or non exclusive for government  
18 employees) on a worldwide basis to the BMJ Publishing Group Ltd, and its Licensees to  
19 permit this article (if accepted) to be published in BMJ editions and any other BMJ PGL  
20 products and to exploit all subsidiary rights, as set out in our licence  
21 ([bmj.com/advice/copyright.shtml](http://bmj.com/advice/copyright.shtml)).

22  
23 **Data sharing statement** No additional data available.

24  
25 **Patient consent:** Obtained

26  
27 **Ethics approval** University of Auckland Human Participants Ethics Committee (ref. 018622).  
28  
29  
30  
31  
32  
33  
34  
35  
36  
37  
38  
39  
40  
41  
42  
43  
44  
45  
46  
47  
48  
49  
50  
51  
52  
53  
54  
55  
56  
57  
58  
59  
60

## REFERENCES

1. Colgan S, Faasse K, Martin LR, *et al*. Perceptions of generic medication in the general population, doctors and pharmacists: a systematic review. *BMJ Open* 2015;5:e008915.
2. Figueiras MJ, Cortes MA, Marcelino D, *et al*. Lay views about medicines: the influence of the illness label for the use of generic versus brand. *Psychol Health* 2010;25:1121-1128.
3. Pechlivanoglou P, Jan van der Veen W, Bos JH, *et al*. Analyzing generic and branded substitution patterns in the Netherlands using prescription data. *BMC Health Serv Res* 2011;11:89-98.
4. Faasse K, Cundy T, Gamble G, *et al*. The effect of an apparent change to a branded or generic medication on drug effectiveness and side effects. *Psychosom Med* 2013;75:90-96.
5. Rathe J, Andersen M, Jarbøl DE, *et al*. Generic switching and non-persistence among medicine users: a combined population-based questionnaire and register study. *PLoS One* 2015;10:e0119688.
6. Weissenfeld J, Stock S, Lungen M, *et al*. The nocebo effect: a reason for patients' non-adherence to generic substitution? *Die Pharmazie-An International Journal of Pharmaceutical Sciences* 2010;65:451-456.
7. Zeidan B, Anderson K, Peiris L, *et al*. The impact of tamoxifen brand switch on side effects and patient compliance in hormone receptor positive breast cancer patients. *The Breast* 2016;29:62-67.
8. Desai RJ, Sarpatwari A, Dejene S, *et al*. Differences in rates of switchbacks after switching from branded to authorized generic and branded to generic drug products: cohort study. *BMJ* 2018;361:k1180.
9. Faasse K, Grey A, Horne R, *et al*. High perceived sensitivity to medicines is associated with higher medical care utilisation, increased symptom reporting and greater information seeking about medication. *Pharmacoepidemiol Drug Saf* 2015;24:592-599.
10. Balasopoulos T, Charonis A, Athanakis K, *et al*. Why do generic drugs fail to achieve an adequate market share in Greece? Empirical findings and policy suggestions. *Health Policy* 2017;121:265-272.
11. Webster RK, Weinman J, Rubin GJ. Medicine-related beliefs predict attribution of symptoms to a sham medicine: a prospective study. *Br J Health Psychol* 2018.
12. Henry D. Patients say generic Pharmaco-funded version of antidepressant venlafaxine left them depressed, anxious. *The New Zealand Herald* 2018 Feb. <http://www.nzherald.co.nz/> (accessed 17 Apr 2018).
13. Maude S. Anti-depressant swap: Sufferers claim generic drug is harming their condition. *Stuff* 2018 Feb. <https://www.stuff.co.nz/> (accessed 17 Apr 2018).
14. Petrie KJ, Faasse K, Crichton F, *et al*. How common are symptoms? Evidence from a New Zealand national telephone survey. *BMJ Open* 2014;4:005374.

1  
2  
3 15. Horne R, Faasse K, Cooper V, *et al.* The perceived sensitivity to medicines (PSM) scale:  
4 an evaluation of validity and reliability. *Br J Health Psychol* 2013;18:18-30.

5  
6 16. Faasse K, Grey A, Jordan R, *et al.* Seeing is believing: impact of social modelling on  
7 placebo and nocebo responding. *Health Psychol* 2015;34:880-885.

8  
9 17. Faasse K, Martin LR, Grey A, *et al.* Impact of brand or generic labeling on medication  
10 effectiveness and side effects. *Health Psychol* 2016;35:187-190.  
11  
12  
13  
14  
15  
16  
17  
18  
19  
20  
21  
22  
23  
24  
25  
26  
27  
28  
29  
30  
31  
32  
33  
34  
35  
36  
37  
38  
39  
40  
41  
42  
43  
44  
45  
46  
47  
48  
49  
50  
51  
52  
53  
54  
55  
56  
57  
58  
59  
60

1  
2  
3 **Figure 1** Comparison of the people on branded venlafaxine and those on generic  
4 venlafaxine in their beliefs about the efficacy, safety and side effects of branded and generic  
5 medicines.

6 \* $p < .05$   
7  
8  
9  
10  
11  
12  
13  
14  
15  
16  
17  
18  
19  
20  
21  
22  
23  
24  
25  
26  
27  
28  
29  
30  
31  
32  
33  
34  
35  
36  
37  
38  
39  
40  
41  
42  
43  
44  
45  
46  
47  
48  
49  
50  
51  
52  
53  
54  
55  
56  
57  
58  
59  
60

For peer review only

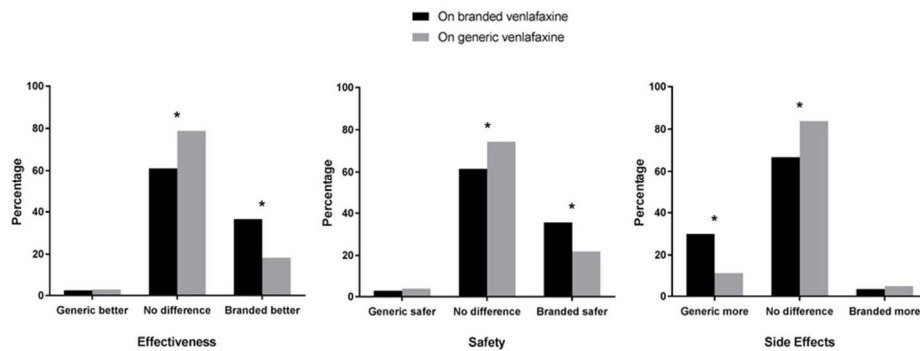

Figure 1 Comparison of the people on branded venlafaxine and those on generic venlafaxine in their beliefs about the efficacy, safety and side effects of branded and generic medicines.

81x32mm (300 x 300 DPI)

# BMJ Open

## What is associated with increased side effects and lower perceived efficacy following switching to a generic medicine? A New Zealand cross-sectional patient survey

|                                 |                                                                                 |
|---------------------------------|---------------------------------------------------------------------------------|
| Journal:                        | <i>BMJ Open</i>                                                                 |
| Manuscript ID                   | bmjopen-2018-023667.R1                                                          |
| Article Type:                   | Research                                                                        |
| Date Submitted by the Author:   | 12-Jul-2018                                                                     |
| Complete List of Authors:       | MacKrell, Kate; University of Auckland<br>Petrie, Keith; University of Auckland |
| <b>Primary Subject Heading</b>: | Pharmacology and therapeutics                                                   |
| Secondary Subject Heading:      | Communication, Health services research, Pharmacology and therapeutics          |
| Keywords:                       | generic medicine, drug switching, perceptions, nocebo, side effects             |
|                                 |                                                                                 |

SCHOLARONE™  
Manuscripts

View Only

1  
2  
3  
4  
5 **What is associated with increased side effects and lower perceived efficacy following**  
6 **switching to a generic medicine? A New Zealand cross-sectional patient survey**  
7  
8  
9  
10

11  
12 Kate MacKrell, Keith J Petrie

13  
14 University of Auckland, Private Bag 92019, New Zealand

15  
16  
17  
18 Department of Psychological Medicine, University of Auckland, New Zealand.  
19

20  
21  
22 Kate MacKrell, Graduate student, Department of Psychological Medicine, University of  
23  
24 Auckland

25  
26 Keith J Petrie, Professor, Department of Psychological Medicine, University of Auckland  
27  
28  
29  
30  
31

32 Word count: 3629  
33  
34  
35

36 Keywords: generic medicine; drug switching; perceptions; nocebo; drug efficacy; side effects  
37  
38  
39  
40  
41

42 Correspondence to: Professor Keith Petrie [kj.petrie@auckland.ac.nz](mailto:kj.petrie@auckland.ac.nz)  
43  
44  
45  
46  
47  
48  
49  
50  
51  
52  
53  
54  
55  
56  
57  
58  
59  
60

**ABSTRACT****OBJECTIVE**

Following a switch from either a generic or branded antidepressant (venlafaxine) to a new generic we investigated the factors associated with a preference for branded medicines, side effects reported following switching and efficacy ratings of the new generic drug.

**DESIGN**

A cross-sectional survey of patients switched to a new generic.

**SETTING**

Patients accessing venlafaxine information online from the New Zealand government pharmaceuticals funding website.

**PARTICIPANTS**

310 patients, comprising 205 originally on branded venlafaxine and 105 previously taking a generic version.

**MAIN OUTCOME MEASURES**

An online questionnaire assessing demographic factors, perceived sensitivity to medicines, trust in pharmaceutical agencies, sources of switch information, preference for branded medicine, new medicine perceptions, side effects and efficacy ratings.

**RESULTS**

Preference for branded medicine was significantly stronger in older patients (OR=1.04, 95% CI 1.01 to 1.05), those taking branded venlafaxine (OR=2.02, 95% CI 1.13 to 3.64) and patients with a higher perceived sensitivity to medicine (OR=1.23, 95% CI 1.06 to 1.19).

Different factors predicted side effects in those switching from a branded and those switching from a generic venlafaxine. Trust in pharmaceutical agencies and the number of side effects were significant predictors of efficacy ratings of the new generic in both patients switching from a branded and those switching from a generic version of venlafaxine.

**CONCLUSIONS**

In patients switching from a branded medicine and those already taking a generic, different demographic and psychological factors are associated with preference for branded medicine,



1  
2  
3 side effect reporting and perceived efficacy of the new drug. When switching to new generic  
4 there appears to be a close bidirectional relationship between the experience of side effects  
5 and perceived drug efficacy. Trust in pharmaceutical agencies impacts directly on perceived  
6 efficacy and increasing such trust could reduce the nocebo response following a generic  
7 switch.  
8  
9  
10  
11  
12  
13

## 14 **ARTICLE SUMMARY**

### 15 **Strengths and limitations of the study**

- 16 • The study examined both patients on a branded-originator as well as those already  
17 on a generic switched to a new generic medicine.
- 18 • While previous research has used placebo treatments and non-patient participants,  
19 our study examined preferences and perceptions in a patient sample that had  
20 recently undergone a generic switch in antidepressant medication.
- 21 • Our study is limited by the fact that patients were not randomly sampled and whether  
22 respondents were actually taking venlafaxine could not be independently  
23 corroborated.  
24  
25  
26  
27  
28  
29  
30  
31  
32  
33  
34  
35  
36  
37  
38  
39  
40  
41  
42  
43  
44  
45  
46  
47  
48  
49  
50  
51  
52  
53  
54  
55  
56  
57  
58  
59  
60

## INTRODUCTION

Generic medicines present a cost-effective option for health funders, as they provide the same therapeutic effect as branded medicine, but at a much more affordable price. While generic drugs are now widely used, a significant proportion of the general public, doctors and pharmacists report negative perceptions of generics, in terms of their effectiveness, safety and likelihood to cause side effects.[1] Many patients believe that generic drugs are not suitable for treating serious conditions[2] and there seems greater reluctance to accept generics in patients already established on branded antidepressants compared to other types of medicines.[3]

Negative perceptions of generics can lead to an increase in the nocebo effect following switching from a branded to a generic alternative with greater complaints of side effects and beliefs that the new medication is less effective.[4] These perceptions can cause increased adverse event reporting, drug refusal and non-adherence when patients are switched from a branded to a generic medicine.[5-7] Beliefs that the drug is less effective or causing side effects can also result in a significant number of patients switching back to the branded medication, resulting in less cost savings for the health system.[8]

There has been little research on the factors associated with a nocebo response following a switch to generic medicine. Previous research suggests patients who have high perceived sensitivity to medicine may be more reluctant to change to a generic and more likely to report side effects.[9] Trust in pharmaceutical agencies such as drug companies and the government organisations regulating drugs also seem to be important factors in generic acceptance.[10] A recent study investigating the attribution of symptoms to a placebo described as “a well-known tablet” found that perceived sensitivity to medicine increased the odds of attributing symptoms to the placebo tablet, while trust in medicines and pharmaceutical companies decreased the likelihood of attributing symptoms.[11]

In 2017, the Pharmaceutical Management Agency (Pharmac), the New Zealand government agency responsible for subsidising medicines, changed the funded version of the antidepressant venlafaxine. Over the course of 2017, 45,000 New Zealanders prescribed

1  
2  
3 either Efexor XR (the branded originator) or Arrow-Venlafaxine XR (a generic version) were  
4 switched to a new generic, Enlafax XR. From the outset of the venlafaxine brand switch,  
5  
6 some patients reported side effects from the new generic, such as nausea, fatigue,  
7  
8 headaches, suicidal thoughts and stated that the drug was not as effective as their previous  
9  
10 branded version. Media stories following the switch to generic venlafaxine reflected patient  
11  
12 concerns, with article headlines such as “Patients say generic Pharmac-funded version of  
13  
14 antidepressant venlafaxine left them depressed, anxious”[12] and “Anti-depressant swap:  
15  
16 Sufferers claim generic drug is harming their condition”. [13] This drug switch allowed the  
17  
18 opportunity to examine differences between patients switched from an originator brand as  
19  
20 well as generic venlafaxine to a new generic version of the antidepressant. The aim of the  
21  
22 study was to investigate how both branded and generic groups viewed generic drugs and  
23  
24 what factors influenced a preference for branded medicines. We also investigated what  
25  
26 factors were associated with side effect reporting following the switch and patients’ efficacy  
27  
28 ratings of the new generic drug.  
29

## 30 **METHOD**

### 31 **Participants and procedure**

32  
33 Visitors to the [venlafaxine brand change page](#) on the Pharmac website were invited to  
34  
35 complete an online questionnaire about their perceptions and experiences of the venlafaxine  
36  
37 brand change. To be eligible to participate, respondents had to be 16 years of age or older  
38  
39 and currently taking any brand of venlafaxine medication. A link to the survey was provided  
40  
41 on the same webpage and was live from 6 March 2017 to 29 October 2017. The survey was  
42  
43 anonymous and confidential, with IP addresses and geo-location data from individual  
44  
45 responses not recorded. As the survey was anonymous, completion and submission of the  
46  
47 questionnaire implied informed consent to participate. This was stated on the participant  
48  
49 information page, which respondents read before starting the questionnaire. The University  
50  
51 of Auckland Human Participants Ethics Committee approved the study (ref. 018622).  
52  
53

### 54 **Measures**

#### 55 *Demographic information*

56  
57  
58  
59  
60

1  
2  
3 Participants completed information on age, gender, relationship status, employment status,  
4  
5 highest level of education completed and ethnicity.

#### 6 7 *Venlafaxine brand information and efficacy ratings*

8  
9 Introductory survey questions collected information on participants' old venlafaxine  
10  
11 prescription, specifically the medication brand, time on drug and how participants found out  
12  
13 about the brand switch. Participants' perceived efficacy of their old brand and the new  
14  
15 generic was assessed using an 11-point scale from 0 "Does not work well" to 10 "Works  
16  
17 extremely well" which was developed for this study.

#### 18 19 *Medication preference*

20  
21 Participants were asked to consider if given the choice to take a branded or generic version  
22  
23 of a prescribed medicine with no difference in cost, which medicine would they prefer to  
24  
25 take? Answers were scored "branded version", "generic version" or "no preference". They  
26  
27 were also asked to specify, of branded versus generic medicines, which did they expect to  
28  
29 be more effective, safe and have fewer side effects. Answers were scored "branded version",  
30  
31 "generic version" or "no difference". Participants were also asked: "how often do you look up  
32  
33 medication information on the Internet?" assessed using an 11-point scale from 0 "Never" to  
34  
35 10 "Always". These items have been previously used in a large general population survey [9].

#### 36 37 *Trust in pharmaceutical agencies*

38  
39 Participants were asked to rate how much they trusted brand switch information from  
40  
41 pharmacists, PHARMAC, Medsafe and pharmaceutical companies on an 11-point scale from  
42  
43 0 "Do not trust" to 10 "Completely trust". Participants' scores for these items which were  
44  
45 developed for this study were summed to create an overall score of trust in pharmaceutical  
46  
47 agencies, which had an acceptable Cronbach's alpha ( $\alpha = .79$ ).

#### 48 49 *Side effects*

50  
51 Participants were given a list of 15 frequently reported symptoms (e.g., headache, dizziness,  
52  
53 chest pain, nausea, abdominal pain[14]) and were asked to indicate whether they had  
54  
55 experienced any from the new generic venlafaxine within the past week. Answers were  
56  
57  
58  
59  
60

1  
2  
3 scored “yes”, “maybe” or “no”. The number of side effects experienced (both yes and maybe)  
4  
5 was summed to create a total side effect score.

### 6 *Perceived sensitivity to medicines*

7  
8 The perceived sensitivity to medicines scale[15] was used to assess participants' self-rated  
9  
10 reaction to medicines. The scale consists of five items rated on a 5-point scale from 1  
11  
12 “Strongly Disagree” to 5 “Strongly Agree”, an example being “My body overacts to  
13  
14 medicines”. The five items were summed to create a total sensitivity score ranging from 5 to  
15  
16 25, with higher scores indicating a greater perceived sensitivity to the adverse effect of  
17  
18 medicines. The scale has shown acceptable reliability and validity in a general population  
19  
20 sample[9] as well as in different patient groups[15,16].  
21

### 22 **Statistical analyses**

23  
24 Analyses were performed using IBSM SPSS 24. To ascertain what factors influenced a  
25  
26 preference for branded medicines, a logistic regression was conducted with medication  
27  
28 preference converted to a binary outcome variable of generic or no preference (0) versus a  
29  
30 preference for branded medication (1). The predictors in this model were age, gender,  
31  
32 education level (dichotomised and dummy coded as university degree 1 or lower 0), ethnicity  
33  
34 (NZ European 1 or other 0, pre-switch medication type (brand 1 or generic 0) time on  
35  
36 previous venlafaxine brand, participants' perceived efficacy of their old brand, perceived  
37  
38 efficacy of the new generic, perceived sensitivity to medicines score, pharmaceutical trust  
39  
40 score and the degree to which participants look up medicine information on the internet.  
41

42 In further analyses, the total sample was separated into two groups: the participants  
43  
44 who switched from branded venlafaxine to the new generic and those who switched from the  
45  
46 old generic to the new version. Independent sample t-tests and chi-square tests were  
47  
48 conducted to investigate whether there were any differences between the brand and generic  
49  
50 switch groups on demographic variables, beliefs about the efficacy, safety and side effects of  
51  
52 branded and generic medicines, efficacy ratings of the new generic venlafaxine and side  
53  
54 effect reports. To investigate what factors were associated with the two groups' efficacy  
55  
56 ratings of the new generic, a multiple linear regression was conducted for each group using  
57  
58  
59  
60

1  
2 participants' efficacy rating of the new generic as the outcome variable. The predictor  
3 variables used in these analyses were the same variables used in the analysis of medication  
4 preferences, except with the removal of pre-switch medication type and new generic efficacy  
5 rating and the inclusion of the number of side effects reported. To investigate the factors  
6 associated with greater side effect reporting in the two groups, multiple linear regressions  
7 were conducted with the side effect score as the outcome variable. The predictor variables  
8 used in these models were the same as medication preferences except with pre-switch  
9 medication type removed. An alpha level of .05 was used for all analyses.

### 18 **Patient and public involvement**

19 Patients and the public were not involved in the development and conduct of this study.

## 22 **RESULTS**

23 In total, 413 people accessed the survey, however, 103 respondents were excluded: 85 did  
24 not complete the survey, nine did not meet the inclusion criteria and a further nine  
25 participants did not know their original brand of venlafaxine. This resulted in a final sample of  
26 310 participants. The sample was predominantly female  $n = 246$  (79.4%), with a mean age of  
27 45 years ( $SD = 13.50$ ). The majority of the sample identified as New Zealand or other  
28 European  $n = 275$  (88.7%), 21 (6.8%) as Māori and smaller proportions identifying as Asian,  
29 Pacific Islander and other ethnicities. The demographic breakdown of the sample is similar to  
30 the total population of venlafaxine users in New Zealand, as shown in Table 1. Two hundred  
31 and five people were previously on branded venlafaxine and 105 were taking a generic.  
32 There were no significant differences between the two switch groups on demographic  
33 variables (Table 1).

34  
35  
36  
37  
38  
39  
40  
41  
42  
43  
44  
45  
46  
47  
48  
49  
50  
51  
52  
53  
54  
55  
56  
57  
58  
59  
60  
The majority of the sample,  $n = 228$  (73.5%), found out about the venlafaxine brand  
switch through a pharmacist, while 45 participants (14.5%) said they were not directly told  
about the switch and only found out after noticing a change in their tablets and 12 people  
(3.9%) were informed of the brand switch by their doctor. The remaining proportion either  
found out through the Pharmac website, social media or news media, or friends and family.  
However, when participants were asked how they would have preferred to have found out

about the brand switch, 173 (55.8%) said through their doctor, 86 (27.7%) by a pharmacist and 36 (11.6%) from Pharmac directly.

**Table 1** Demographics characteristics for the population of venlafaxine users and comparison between branded and generic switch study samples

| Variable                         | Population<br>(n = 49,175)<br>n (%) | Brand Sample<br>(n = 205)<br>n (%) | Generic Sample<br>(n = 105)<br>n (%) | $t/\chi^2$ | <i>p</i> |
|----------------------------------|-------------------------------------|------------------------------------|--------------------------------------|------------|----------|
| Age (mean, SD)                   | -                                   | 45.0 (13.16)                       | 44.3 (14.18)                         | 0.38       | .703     |
| Age group                        |                                     |                                    |                                      | 5.44       | .364     |
| > 19 years                       | 1,155 (2.3)                         | 0                                  | 1 (1.0)                              |            |          |
| 20-29 years                      | 7,309 (14.9)                        | 27 (13.2)                          | 20 (19.0)                            |            |          |
| 30-39 years                      | 8,202 (16.7)                        | 50 (24.4)                          | 20 (19.0)                            |            |          |
| 40-49 years                      | 10,899 (22.2)                       | 50(24.4)                           | 21 (20.0)                            |            |          |
| 50-69 years                      | 16,677 (33.9)                       | 51 (24.9)                          | 26 (24.8)                            |            |          |
| < 70 years                       | 4,933 (10.0)                        | 27 (13.2)                          | 17 (16.2)                            |            |          |
| Gender                           |                                     |                                    |                                      | 0.70       | .401     |
| Male                             | 17,478 (35.5)                       | 42 (20.7)                          | 17 (16.7)                            |            |          |
| Female                           | 31,695 (64.5)                       | 161 (79.3)                         | 85 (83.3)                            |            |          |
| Ethnicity                        |                                     |                                    |                                      | 0.22       | .896     |
| European                         | 42,944 (87.3)                       | 184 (90.6)                         | 91 (89.2)                            |            |          |
| Māori                            | 4,210 (8.6)                         | 13 (6.4)                           | 8 (7.8)                              |            |          |
| Other                            | 2,021 (4.1)                         | 6 (3.0)                            | 3 (2.9)                              |            |          |
| Education level                  |                                     |                                    |                                      | 3.26       | .196     |
| Secondary school or below        |                                     | 44 (22.0)                          | 33 (31.4)                            |            |          |
| Diploma/Trade certificate        |                                     | 68 (34.0)                          | 32 (30.5)                            |            |          |
| University degree                |                                     | 88 (44.0)                          | 40 (38.1)                            |            |          |
| Relationship status              |                                     |                                    |                                      | 5.83       | .120     |
| Married, civil union, cohabiting |                                     | 124 (61.7)                         | 53 (51.5)                            |            |          |
| Single                           |                                     | 48 (23.9)                          | 32 (31.1)                            |            |          |
| Divorced, separated              |                                     | 25 (12.4)                          | 18 (17.5)                            |            |          |
| Widow, widower                   |                                     | 4 (2.0)                            | 0                                    |            |          |

$t/\chi^2$  analyses conducted between the brand sample and generic sample.

Population data obtained from Pharmac.

### Preference for branded or generic medicine

One hundred and eighty participants (58.1%) reported a greater preference for branded medicines overall while 130 (41.9%) preferred generics or had no preference. Compared to the people previously taking a generic, a greater proportion of those originally taking the branded venlafaxine considered branded medicines to be safer, more effective and have fewer side effects than generics (Figure 1). Those prescribed generics were more likely to perceive branded and generic medicines as being equivalent in safety, efficacy and the number of side effects.

(Figure 1)

The analysis of factors influencing people's medicine preferences was significant,  $\chi^2(12) = 44.74$ ,  $p < .001$ , Nagelkerke  $R^2 = .20$ . The significant factors associated with medicine preference were participants' age, pre-switch medication type and perceived sensitivity to medicines. The results indicate that an older age, originally being on the branded venlafaxine medication and a greater perceived sensitivity to medicines is associated with a greater preference for branded medicines overall (Table 2).

**Table 2** Factors associated with a preference for branded medicines

| Variable                                 | B     | Wald  | OR   | <i>p</i> | 95% CI for OR |
|------------------------------------------|-------|-------|------|----------|---------------|
| Age                                      | 0.04  | 10.66 | 1.04 | .001     | 1.01, 1.05    |
| Gender                                   | -0.16 | 0.21  | 0.86 | .647     | 0.44, 1.67    |
| Education level                          | -0.23 | 0.68  | 0.80 | .411     | 0.46, 1.37    |
| Ethnicity                                | 0.33  | 0.72  | 1.40 | .396     | 0.65, 3.01    |
| Pre-switch medication type               | 0.71  | 5.55  | 2.02 | .019     | 1.13, 3.64    |
| Time on previous brand                   | 0.00  | 0.00  | 1.00 | .961     | 0.86, 1.18    |
| Perceived efficacy of old brand          | 0.11  | 2.97  | 1.11 | .085     | 0.99, 1.25    |
| Perceived efficacy of new generic        | 0.00  | 0.01  | 1.00 | .940     | 0.92, 1.10    |
| Perceived sensitivity to medicines       | 0.11  | 14.17 | 1.12 | <.001    | 1.06, 1.19    |
| Trust in pharmaceutical agencies         | -0.02 | 1.60  | 0.98 | .206     | 0.95, 1.01    |
| Look up medicine information on internet | 0.03  | 0.34  | 1.03 | .560     | 0.93, 1.14    |



### Efficacy ratings of the new generic

Both brand and generic switchers rated the efficacy of their old medication very highly (brand switchers  $M = 8.46$  out of 10,  $SD = 2.52$ ; generic switchers  $M = 8.43$ ,  $SD = 2.16$ ). For the new generic, there were no differences between brand switchers ( $M = 3.04$ ,  $SD = 2.97$ ) and generic switchers ( $M = 3.46$ ,  $SD = 3.09$ ) in efficacy ratings,  $t(299) = -1.17$ ,  $p = .244$ , 95% CI -1.14 to 0.29. The factors associated with efficacy ratings in the brand and generic switch groups were investigated. The regression model was significant for the brand switch group,  $F(10, 172) = 3.72$ ,  $p < .001$ ,  $R^2 = .18$ , and the generic switch group,  $F(10, 84) = 5.07$ ,  $p < .001$ ,  $R^2 = .38$ . For both the brand and generic switch groups, the only variables that were significant predictors of new generic efficacy ratings was the pharmaceutical trust score and number of side effects reported (see table 3). Regardless of whether participants were switching from a branded medicine or a generic, a greater degree of trust in pharmaceutical agencies and fewer side effects reported were associated with a greater perceived efficacy of the new generic venlafaxine.

**Table 3** Factors associated with the efficacy ratings of the new generic medicine for brand switchers and generic switchers

| Variable                                 | Brand Switchers |         |       |              | Generic Switchers |         |       |              |
|------------------------------------------|-----------------|---------|-------|--------------|-------------------|---------|-------|--------------|
|                                          | B               | $\beta$ | $p$   | 95% CI for B | B                 | $\beta$ | $p$   | 95% CI for B |
| Age                                      | -0.01           | -.03    | .656  | -0.04, 0.03  | 0.02              | .07     | .457  | -0.03, 0.06  |
| Gender                                   | 0.53            | .07     | .304  | -0.48, 1.54  | -0.98             | -.12    | .187  | -2.44, 0.48  |
| Education level                          | -0.78           | -.13    | .079  | -1.66, 0.09  | -0.58             | -.09    | .339  | -1.77, 0.62  |
| Ethnicity                                | -1.16           | -.13    | .086  | -2.49, 0.17  | 0.03              | .00     | .966  | -1.44, 1.51  |
| Time on previous brand                   | -0.16           | -.09    | .245  | -0.42, 0.11  | -0.07             | -.04    | .677  | -0.38, 0.25  |
| Perceived efficacy of old brand          | 0.16            | .13     | .083  | -0.02, 0.34  | 0.02              | -.01    | .891  | -0.25, 0.29  |
| Perceived sensitivity to medicines       | 0.02            | .03     | .679  | -0.07, 0.10  | -0.03             | -.04    | .682  | -0.15, 0.10  |
| Trust in pharmaceutical agencies         | 0.09            | .26     | <.001 | 0.04, 0.13   | 0.18              | .45     | <.001 | 0.11, 0.24   |
| Look up medicine information on internet | -0.02           | -.01    | .854  | -0.18, 0.15  | -0.01             | -.01    | .959  | -0.22, 0.21  |
| Number of side effects                   | -0.17           | -.24    | .002  | -0.28, -0.07 | -0.27             | -.33    | <.001 | -0.42, -0.13 |

### Side effect reports from the new generic

There was no significant difference in the brand group ( $M = 4.43$ ,  $SD = 4.07$ ) and generic group ( $M = 4.85$ ,  $SD = 3.91$ ) in reported side effects following the switch to the new generic,  $t(308) = -0.86$ ,  $p = .392$ , 95% CI -1.36 to 0.54. An analysis of the factors associated with greater side effect reporting for brand switchers and generic switchers was conducted and is summarised in Table 4. The regression model of the brand switchers was significant,  $F(10, 172) = 3.61$ ,  $p < .001$ ,  $R^2 = .17$ . Age, gender, education level, duration of time on the old brand and perceived efficacy of the new generic were significantly associated with side effect reporting. The analysis shows that brand switchers who were older, female, had an education level below a university degree, had taken Eflexor for a longer period of time and had a lower perceived efficacy of the new generic reported a greater number of side effects from the new generic medication.

The regression model for the generic switchers was also significant  $F(10, 84) = 2.13$ ,  $p = .031$ ,  $R^2 = .20$ . However, the only significant predictor of side effects for this group was perceived efficacy of the new generic. Generic switchers who had a lower perceived efficacy of the new generic reported more side effects following the switch to the new generic.

**Table 4** Factors associated with side effect reporting for brand switchers and generic switchers

| Variable                                 | Brand Switchers |         |      |              | Generic Switchers |         |       |              |
|------------------------------------------|-----------------|---------|------|--------------|-------------------|---------|-------|--------------|
|                                          | B               | $\beta$ | $p$  | 95% CI for B | B                 | $\beta$ | $p$   | 95% CI for B |
| Age                                      | 0.06            | .18     | .017 | 0.01, 0.10   | 0.01              | .04     | .671  | -0.05, 0.07  |
| Gender                                   | 1.41            | .14     | .047 | 0.02, 2.79   | -0.96             | -.10    | .347  | -2.99, 1.06  |
| Education level                          | -1.61           | -.20    | .008 | -2.81, -0.42 | -1.04             | -.13    | .210  | -2.68, 0.60  |
| Ethnicity                                | -0.39           | -.03    | .680 | -2.23, 1.46  | -1.23             | -.12    | .229  | -3.24, 0.79  |
| Time on previous brand                   | -0.50           | -.20    | .007 | -0.86, -0.14 | 0.07              | .03     | .766  | -0.37, 0.50  |
| Perceived efficacy of old brand          | 0.21            | .12     | .102 | -0.04, 0.46  | 0.13              | .08     | .461  | -0.24, 0.51  |
| Perceived efficacy of new generic        | -0.33           | -.24    | .002 | -0.53, -0.13 | -0.52             | -.42    | <.001 | -0.79, -0.24 |
| Perceived sensitivity to medicines       | -0.04           | -.05    | .486 | -0.16, 0.08  | 0.03              | .04     | .718  | -0.14, 0.20  |
| Trust in pharmaceutical agencies         | -0.01           | -.02    | .760 | -0.07, 0.06  | 0.06              | .13     | .245  | -0.04, 0.17  |
| Look up medicine information on internet | -0.05           | -.03    | .664 | -0.28, 0.18  | 0.16              | .12     | .282  | -0.13, 0.46  |

## DISCUSSION

### Key findings

1  
2  
3 In a sample of patients switched to a new generic version of venlafaxine the study found that  
4 preference for branded medication was associated with older age, being on the branded  
5 venlafaxine medication prior to the switch and a greater perceived sensitivity to medicines.  
6  
7 A greater proportion of patients originally prescribed branded venlafaxine expected branded  
8 medicines to be more effective, safe and have fewer side effects than generics, compared to  
9 patients taking the generic who were more likely to perceive branded and generic medicines  
10 as equivalent. For both patient groups, those switching from the branded medication and  
11 those switching from a generic, a greater degree of trust in pharmaceutical agencies and less  
12 side effects reported were associated with a higher perceived efficacy of the new generic  
13 venlafaxine. For those switching from the branded venlafaxine, being older, female, having a  
14 lower education level, being on the branded drug for a longer time and having a lower  
15 perceived efficacy of the new generic was associated with reporting a greater number of side  
16 effects from the new generic medication. For those patients already on a generic, only a  
17 lower perceived efficacy of the new drug was associated with side effect reporting.  
18  
19  
20  
21  
22  
23  
24  
25  
26  
27  
28  
29

### 30 **Implications**

31  
32 Switches from originator branded medicines to their generic counterparts provide an  
33 economic choice for health funders by enabling more patients to be treated through cost-  
34 savings. Negative perceptions of generics can cause increased side effects and perceptions  
35 of lower efficacy, which may result in non-adherence and low persistence with the new drug  
36 and reduce the potential economic benefits of a switch. This study shows that trust in  
37 pharmaceutical agencies, including drug companies and regulators, is a key factor in  
38 patients' beliefs in the efficacy of the new generic medicine.  
39  
40  
41  
42  
43  
44  
45

46 Another important finding of the study is the close reciprocal relationship between  
47 perceived drug efficacy and reported side effects. The presence of increased side effects are  
48 associated with a perception that the drug does not work as well and conversely, low efficacy  
49 beliefs are associated with greater reporting of side effects. This is consistent with a recent  
50 study that showed when side effects are modelled by another person receiving the same  
51  
52  
53  
54  
55  
56  
57  
58  
59  
60

1  
2  
3 medication (study confederate), this can influence not only reported side effects in the  
4 individual viewing the person but also reduce the effectiveness of the drug.[17]  
5

6  
7 The study also highlights the fact that patients who switch from a branded medicine  
8 and those who switch from a generic are likely to have different concerns. Patients already  
9 on a generic medicine tend to have a more favourable perception of generics compared to  
10 those taking a branded medicine and the factors that influence side effect reports following a  
11 medicine brand switch are different for brand switchers compared to generic switchers.  
12  
13 People switching from branded medicines are likely to have more difficulties and  
14 interventions focused on building trust in pharmaceutical agencies around the switch are  
15 likely to have positive effects in influencing the perceived efficacy of the new drug and  
16 subsequent side effects. Advertising or education campaigns could aim to build trust around  
17 these pharmaceutical monitoring agencies. This could include explaining the level of testing  
18 required to establish drug equivalency and the monitoring of that does occur by drug  
19 agencies. There may also be an opportunity for intervention by their dispensing pharmacist  
20 with patients switching from a branded to generic formulation to reassure patients about  
21 these concerns.  
22  
23  
24  
25  
26  
27  
28  
29  
30  
31  
32  
33

### 34 **Strengths and limitations**

35  
36 One of the strengths of the study was that it included patients who were switched from  
37 branded originator medication as well as patients on a generic. To our knowledge this is the  
38 first time a study has looked at these groups in the same switch to a generic to examine  
39 factors related to side effect reporting and efficacy perceptions. Previous research  
40 investigating perceptions and responses to medicine change has previously used placebo  
41 tablets and non-patient participants.[4,18] The fact that the sample was recruited from the  
42 Pharmacist venlafaxine brand change webpage means these patients are likely to be more  
43 typical of patients who have concern and difficulties managing a generic switch. A weakness  
44 of the study was that patients were not randomly sampled and whether respondents were  
45 actually taking venlafaxine or experiencing the reported side effects could not be  
46 independently corroborated.  
47  
48  
49  
50  
51  
52  
53  
54  
55  
56  
57  
58  
59  
60

## Conclusions

These results suggest that in a switch to a generic drug different factors are associated with preference for branded medicine, side effect reporting and perceived efficacy of the new drug in patients switching from a branded medicine and those already taking a generic. When switching to new generic there appears to be a close bidirectional relationship between the experience of side effects and perceived drug efficacy. Trust in pharmaceutical agencies impacts directly on perceived efficacy and increasing such trust through an explanation of equivalence testing and monitoring could impact on efficacy beliefs, reduce nocebo effects and later non-adherence following a generic switch.

1  
2  
3  
4  
5  
6  
7 **Author contributions** KM and KP designed the study, planned the data analysis, interpreted  
8 the results and drafted and revised the manuscript. KM collected the data and performed the  
9 data analyses. KP is guarantor.

10  
11 **Funding** This research received no specific grant from any funding agency in the public,  
12 commercial or not-for-profit sectors.

13  
14 **Competing interests:** We have read and understood BMJ policy on declaration of interest  
15 and declare the following: KM declares no conflict of interest. KP has previously received  
16 research funding from Pharmac, the New Zealand Government's Pharmaceutical  
17 Management Agency.

18  
19 **Licence.** The Corresponding Author has the right to grant on behalf of all authors and does  
20 grant on behalf of all authors, an exclusive licence (or non exclusive for government  
21 employees) on a worldwide basis to the BMJ Publishing Group Ltd, and its Licensees to  
22 permit this article (if accepted) to be published in BMJ editions and any other BMJ PGL  
23 products and to exploit all subsidiary rights, as set out in our licence  
24 ([bmj.com/advice/copyright.shtml](http://bmj.com/advice/copyright.shtml)).

25  
26 **Data sharing statement** No additional data available.

27  
28 **Patient consent:** Obtained

29  
30 **Ethics approval** University of Auckland Human Participants Ethics Committee (ref. 018622).

**REFERENCES**

1. Colgan S, Faasse K, Martin LR, *et al.* Perceptions of generic medication in the general population, doctors and pharmacists: a systematic review. *BMJ Open* 2015;5:e008915.
2. Figueiras MJ, Cortes MA, Marcelino D, *et al.* Lay views about medicines: the influence of the illness label for the use of generic versus brand. *Psychol Health* 2010;25:1121-1128.
3. Pechlivanoglou P, Jan van der Veen W, Bos JH, *et al.* Analyzing generic and branded substitution patterns in the Netherlands using prescription data. *BMC Health Serv Res* 2011;11:89-98.
4. Faasse K, Cundy T, Gamble G, *et al.* The effect of an apparent change to a branded or generic medication on drug effectiveness and side effects. *Psychosom Med* 2013;75:90-96.
5. Rathe J, Andersen M, Jarbøl DE, *et al.* Generic switching and non-persistence among medicine users: a combined population-based questionnaire and register study. *PLoS One* 2015;10:e0119688.
6. Weissenfeld J, Stock S, Lungen M, *et al.* The nocebo effect: a reason for patients' non-adherence to generic substitution? *Die Pharmazie-An International Journal of Pharmaceutical Sciences* 2010;65:451-456.
7. Zeidan B, Anderson K, Peiris L, *et al.* The impact of tamoxifen brand switch on side effects and patient compliance in hormone receptor positive breast cancer patients. *The Breast* 2016;29:62-67.
8. Desai RJ, Sarpatwari A, Dejene S, *et al.* Differences in rates of switchbacks after switching from branded to authorized generic and branded to generic drug products: cohort study. *BMJ* 2018;361:k1180.
9. Faasse K, Grey A, Horne R, *et al.* High perceived sensitivity to medicines is associated with higher medical care utilisation, increased symptom reporting and greater information seeking about medication. *Pharmacoepidemiol Drug Saf* 2015;24:592-599.
10. Balasopoulos T, Charonis A, Athanasakis K, *et al.* Why do generic drugs fail to achieve an adequate market share in Greece? Empirical findings and policy suggestions. *Health Policy* 2017;121:265-272.
11. Webster RK, Weinman J, Rubin GJ. Medicine-related beliefs predict attribution of symptoms to a sham medicine: a prospective study. *Br J Health Psychol* 2018.
12. Henry D. Patients say generic Pharmaco-funded version of antidepressant venlafaxine left them depressed, anxious. *The New Zealand Herald* 2018 Feb. <http://www.nzherald.co.nz/> (accessed 17 Apr 2018).
13. Maude S. Anti-depressant swap: Sufferers claim generic drug is harming their condition. *Stuff* 2018 Feb. <https://www.stuff.co.nz/> (accessed 17 Apr 2018).
14. Petrie KJ, Faasse K, Crichton F, *et al.* How common are symptoms? Evidence from a New Zealand national telephone survey. *BMJ Open* 2014;4:005374.
15. Horne R, Faasse K, Cooper V, *et al.* The perceived sensitivity to medicines (PSM) scale: an evaluation of validity and reliability. *Br J Health Psychol* 2013;18:18-30.
16. Petrie KJ, Moss-Morris R, Grey C, *et al.* The relationship of negative affect and perceived sensitivity to symptom reporting following vaccination. *Br J Health Psychol* 2014;9:101-111.
17. Faasse K, Grey A, Jordan R, *et al.* Seeing is believing: impact of social modelling on placebo and nocebo responding. *Health Psychol* 2015;34:880-885.

1  
2  
3  
4 18. Faasse K, Martin LR, Grey A, *et al*. Impact of brand or generic labeling on medication  
5 effectiveness and side effects. *Health Psychol* 2016;35:187-190.  
6  
7  
8  
9  
10  
11  
12  
13  
14  
15  
16  
17  
18  
19  
20  
21  
22  
23  
24  
25  
26  
27  
28  
29  
30  
31  
32  
33  
34  
35  
36  
37  
38  
39  
40  
41  
42  
43  
44  
45  
46  
47  
48  
49  
50  
51  
52  
53  
54  
55  
56  
57  
58  
59  
60



1  
2  
3 **Figure 1** Comparison of the people on branded venlafaxine and those on generic  
4 venlafaxine in their beliefs about the efficacy, safety and side effects of branded and generic  
5 medicines.

6 \* $p < .05$   
7  
8  
9  
10  
11  
12  
13  
14  
15  
16  
17  
18  
19  
20  
21  
22  
23  
24  
25  
26  
27  
28  
29  
30  
31  
32  
33  
34  
35  
36  
37  
38  
39  
40  
41  
42  
43  
44  
45  
46  
47  
48  
49  
50  
51  
52  
53  
54  
55  
56  
57  
58  
59  
60

For peer review only

1  
2  
3  
4  
5  
6  
7  
8  
9  
10  
11  
12  
13  
14  
15  
16  
17  
18  
19  
20  
21  
22  
23  
24  
25  
26  
27  
28  
29  
30  
31  
32  
33  
34  
35  
36  
37  
38  
39  
40  
41  
42  
43  
44  
45  
46  
47  
48  
49  
50  
51  
52  
53  
54  
55  
56  
57  
58  
59  
60

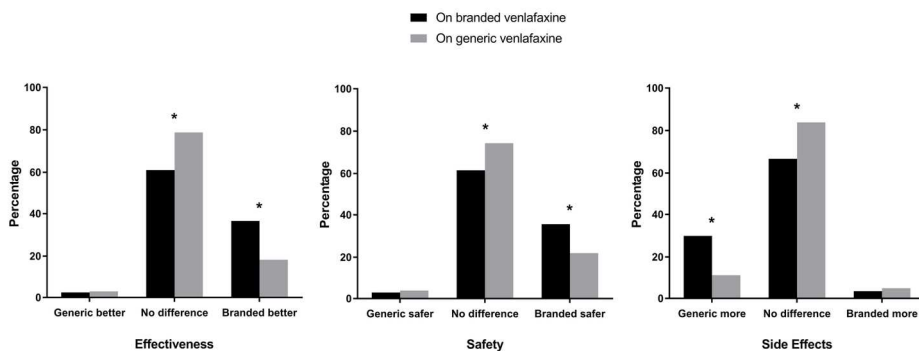

81x32mm (600 x 600 DPI)

Peer review only

**STROBE 2007 (v4) Statement—Checklist of items that should be included in reports of *cross-sectional studies***

| Section/Topic             | Item # | Recommendation                                                                                                                                                                       | Reported on page # |
|---------------------------|--------|--------------------------------------------------------------------------------------------------------------------------------------------------------------------------------------|--------------------|
| <b>Title and abstract</b> | 1      | (a) Indicate the study’s design with a commonly used term in the title or the abstract                                                                                               | 1                  |
|                           |        | (b) Provide in the abstract an informative and balanced summary of what was done and what was found                                                                                  | 2                  |
| <b>Introduction</b>       |        |                                                                                                                                                                                      |                    |
| Background/rationale      | 2      | Explain the scientific background and rationale for the investigation being reported                                                                                                 | 4                  |
| Objectives                | 3      | State specific objectives, including any prespecified hypotheses                                                                                                                     | 5                  |
| <b>Methods</b>            |        |                                                                                                                                                                                      |                    |
| Study design              | 4      | Present key elements of study design early in the paper                                                                                                                              | 5                  |
| Setting                   | 5      | Describe the setting, locations, and relevant dates, including periods of recruitment, exposure, follow-up, and data collection                                                      | 5                  |
| Participants              | 6      | (a) Give the eligibility criteria, and the sources and methods of selection of participants                                                                                          | 5                  |
| Variables                 | 7      | Clearly define all outcomes, exposures, predictors, potential confounders, and effect modifiers. Give diagnostic criteria, if applicable                                             | 5-7                |
| Data sources/ measurement | 8*     | For each variable of interest, give sources of data and details of methods of assessment (measurement). Describe comparability of assessment methods if there is more than one group | 5-7                |
| Bias                      | 9      | Describe any efforts to address potential sources of bias                                                                                                                            | 8                  |
| Study size                | 10     | Explain how the study size was arrived at                                                                                                                                            | 5                  |
| Quantitative variables    | 11     | Explain how quantitative variables were handled in the analyses. If applicable, describe which groupings were chosen and why                                                         | 6-8                |
| Statistical methods       | 12     | (a) Describe all statistical methods, including those used to control for confounding                                                                                                | 7-8                |
|                           |        | (b) Describe any methods used to examine subgroups and interactions                                                                                                                  | 7-8                |
|                           |        | (c) Explain how missing data were addressed                                                                                                                                          | NA                 |
|                           |        | (d) If applicable, describe analytical methods taking account of sampling strategy                                                                                                   | NA                 |
|                           |        | (e) Describe any sensitivity analyses                                                                                                                                                | NA                 |
| <b>Results</b>            |        |                                                                                                                                                                                      |                    |

|                          |     |                                                                                                                                                                                                              |        |
|--------------------------|-----|--------------------------------------------------------------------------------------------------------------------------------------------------------------------------------------------------------------|--------|
| Participants             | 13* | (a) Report numbers of individuals at each stage of study—eg numbers potentially eligible, examined for eligibility, confirmed eligible, included in the study, completing follow-up, and analysed            | 8      |
|                          |     | (b) Give reasons for non-participation at each stage                                                                                                                                                         | 8      |
|                          |     | (c) Consider use of a flow diagram                                                                                                                                                                           | NA     |
| Descriptive data         | 14* | (a) Give characteristics of study participants (eg demographic, clinical, social) and information on exposures and potential confounders                                                                     | 8      |
|                          |     | (b) Indicate number of participants with missing data for each variable of interest                                                                                                                          | NA     |
| Outcome data             | 15* | Report numbers of outcome events or summary measures                                                                                                                                                         | 10-12  |
| Main results             | 16  | (a) Give unadjusted estimates and, if applicable, confounder-adjusted estimates and their precision (eg, 95% confidence interval). Make clear which confounders were adjusted for and why they were included | 11, 12 |
|                          |     | (b) Report category boundaries when continuous variables were categorized                                                                                                                                    | 7      |
|                          |     | (c) If relevant, consider translating estimates of relative risk into absolute risk for a meaningful time period                                                                                             | NA     |
| Other analyses           | 17  | Report other analyses done—eg analyses of subgroups and interactions, and sensitivity analyses                                                                                                               | NA     |
| <b>Discussion</b>        |     |                                                                                                                                                                                                              |        |
| Key results              | 18  | Summarise key results with reference to study objectives                                                                                                                                                     | 12-13  |
| Limitations              | 19  | Discuss limitations of the study, taking into account sources of potential bias or imprecision. Discuss both direction and magnitude of any potential bias                                                   | 14     |
| Interpretation           | 20  | Give a cautious overall interpretation of results considering objectives, limitations, multiplicity of analyses, results from similar studies, and other relevant evidence                                   | 14-15  |
| Generalisability         | 21  | Discuss the generalisability (external validity) of the study results                                                                                                                                        |        |
| <b>Other information</b> |     |                                                                                                                                                                                                              |        |
| Funding                  | 22  | Give the source of funding and the role of the funders for the present study and, if applicable, for the original study on which the present article is based                                                | NA     |

\*Give information separately for cases and controls in case-control studies and, if applicable, for exposed and unexposed groups in cohort and cross-sectional studies.

**Note:** An Explanation and Elaboration article discusses each checklist item and gives methodological background and published examples of transparent reporting. The STROBE checklist is best used in conjunction with this article (freely available on the Web sites of PLoS Medicine at <http://www.plosmedicine.org/>, Annals of Internal Medicine at <http://www.annals.org/>, and Epidemiology at <http://www.epidem.com/>). Information on the STROBE Initiative is available at [www.strobe-statement.org](http://www.strobe-statement.org).
